# Supplementary material
Source: PubMed Central journal article supplement (PMC3957977)
Supplement: IAI.01216-13_zii999090530so1.pdf [file IAI.01216-13_zii999090530so1.pdf]

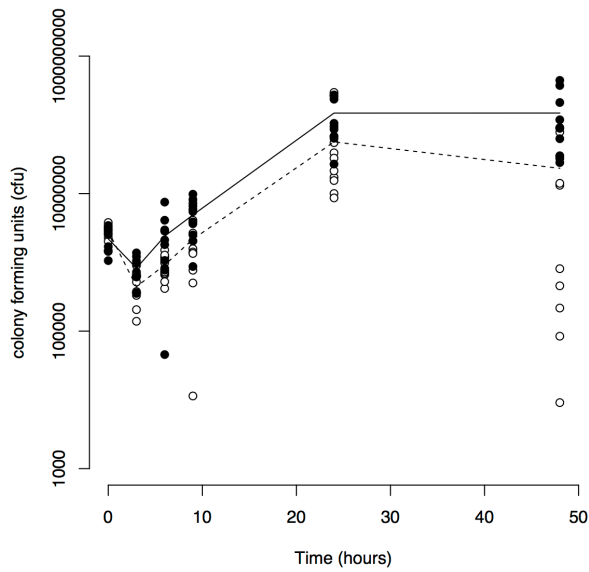

**Figure S1. Growth of the wild-type and *agr* mutant over time.** This includes the 48 h data point shown in Fig. 1a. We grew the wild-type(●) and *agr* mutant(○) in waxmoths for 48 h, in single and mixed infections. When grown as monocultures in hosts, the QS wild-type grew to higher densities than the *agr* mutant, suggesting a benefit of QS at the group level. Mean  $\pm$  S.E. 60 worms per group and 10 worms were sacrificed at each time point.
