# Supplementary material
Source: PubMed Central journal article supplement (PMC3957977)
Supplement: IAI.01216-13_zii999090530so2.pdf [file IAI.01216-13_zii999090530so2.pdf]

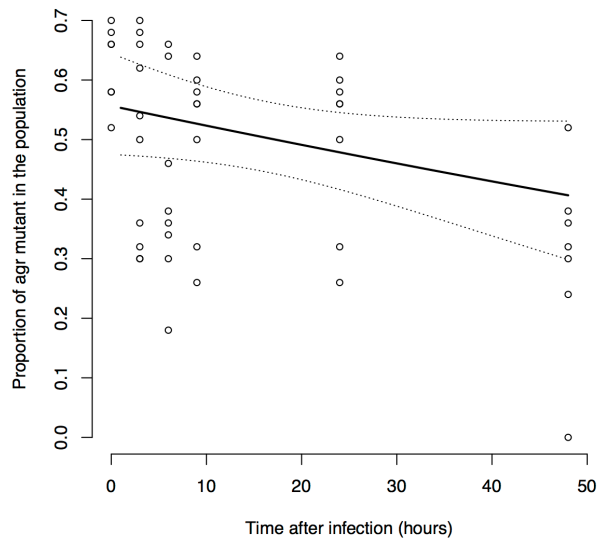

**Figure S2. *agr* mutants do not invade wild type populations when starting from high frequency.** 60 waxmoths per treatment group were injected with a high starting frequency of *agr* mutant (64.5%). At 6 separate time points, 10 worms were sacrificed and the proportion of *agr* mutants determined. Each point on the graph represents a single worm. Regression lines are shown in black and 95% confidence intervals are shown with dotted lines.
