# Supplementary material
Source: PubMed Central journal article supplement (PMC3957977)
Supplement: IAI.01216-13_zii999090530so3.pdf [file IAI.01216-13_zii999090530so3.pdf]

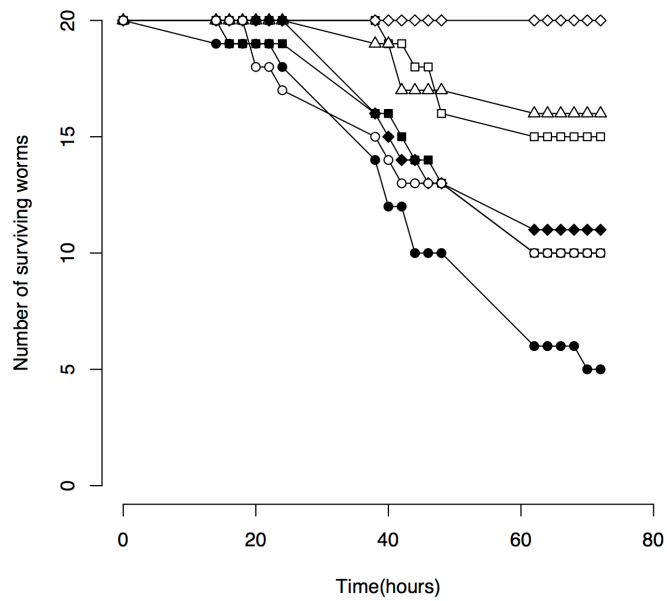

**Figure S3. QS and virulence.** The survival curves for *Galleria* infected with either the RN6390B wild type (●), the *agr* mutant (□), 96%Δ*agr* (△), 78.3%Δ*agr* (■), 22.5%Δ*agr* (○), 4.5%Δ*agr* (◆), PBS control (◇).
