# Supplementary material
Source: PubMed Central journal article supplement (PMC3957977)
Supplement: IAI.01216-13_zii999090530so4.pdf [file IAI.01216-13_zii999090530so4.pdf]

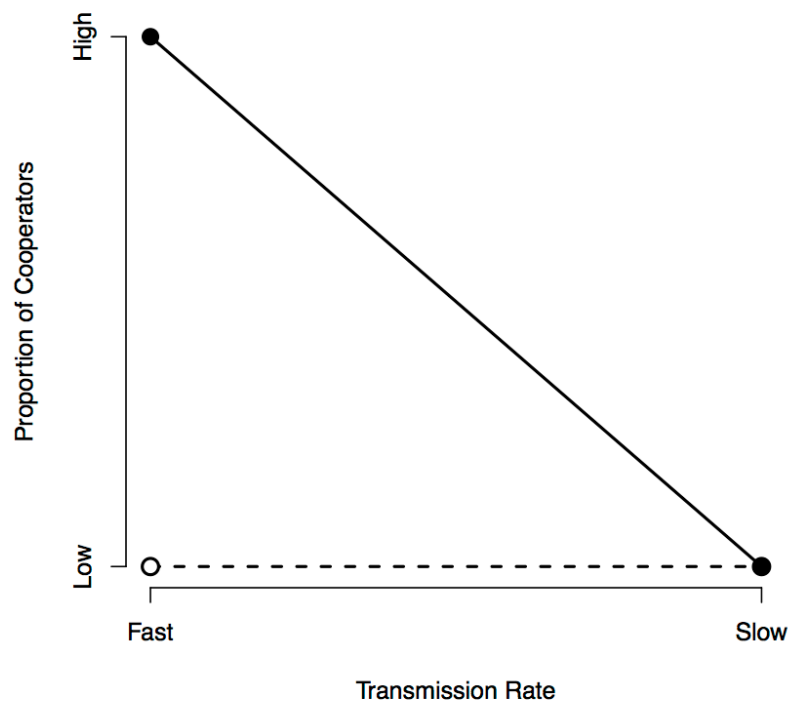

**Figure S4. Hypothesised relationship between cooperation, transmission speed and population structure in a virulence model.** The solid line (closed circles) shows cooperation in high relatedness ( $r = 1$ ) populations whilst the dashed line (open circles) shows cooperation in low relatedness populations ( $r < 1$ ). Selection for cooperation is hypothesised to be common only under conditions of low host mortality (fast transmission) and high relatedness.
