# Supplementary material
Source: PubMed Central journal article supplement (PMC3957977)
Supplement: IAI.01216-13_zii999090530so5.pdf [file IAI.01216-13_zii999090530so5.pdf]

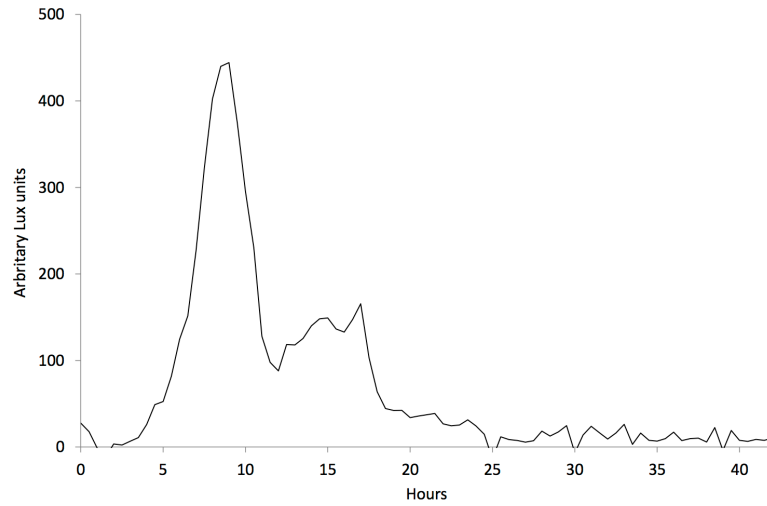

**Figure S5. Expression of *agr*-dependent QS in *Galleria mellonella*.** An RN6390B *agr* reporter strain was inoculated into waxmoth larvae and light produced by the *lux agr* reporter was recorded by a TECAN plate reader every 30 minutes. The data presented represents the mean *lux* activity of the reporter strain in the 20 waxmoth larvae used.
